# Supplementary material
Source: publisher figshare collection journal article supplement (https://acs.figshare.com/ndownloader/files/5192269)
Supplement: Supplementary file 1 [file 5192269]

## Supporting Information

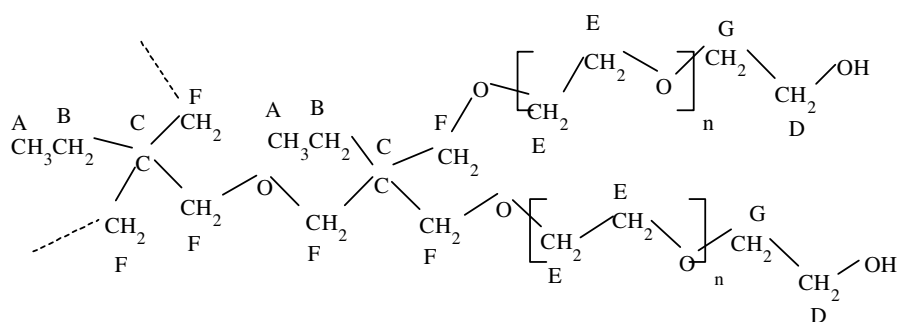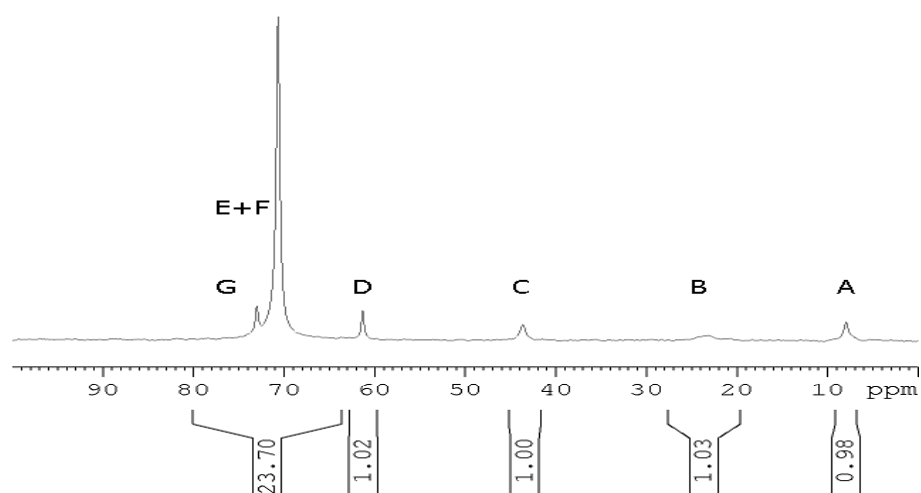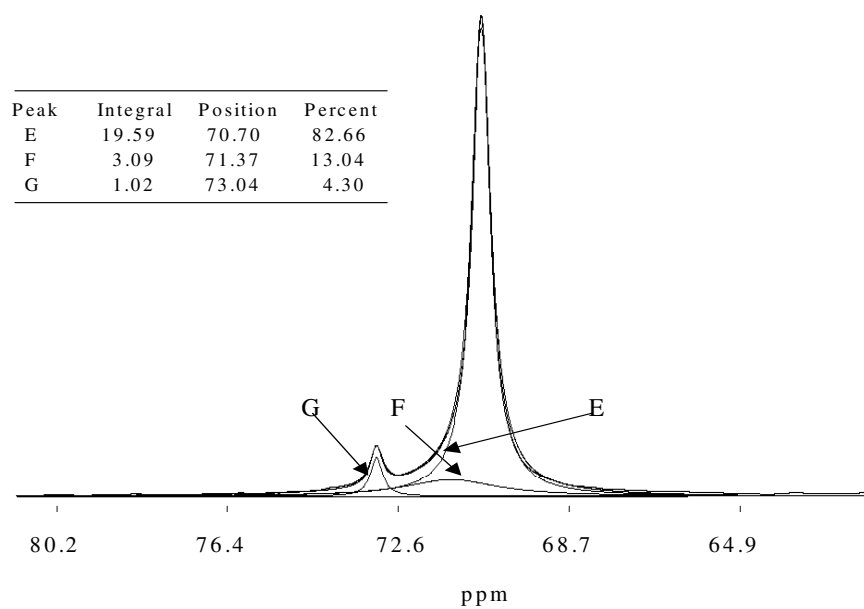

**Figure s1.** Quantitative MAS solid-state  $^{13}\text{C}$  NMR spectrum of the multi-arm hyperbranched polyether **3**. Due to the overlap of the signals in the low field, a curve-fitting procedure was adopted and the assignment and ratio of each peak were listed. In terms of the intensities of peaks E, D and C, the molar ratio of ethylene glycol units in the arms to 3-ethyl-3-oxetanemethanol units in the hyperbranched core is found to be 10.8 ( $(\text{E}/2+\text{D})/\text{C} = 10.8$ ). Since the average number of repeat units of PEG arms determined by the intensities of peaks E and D is 10.6 ( $\text{E}/2\text{D}+\text{D} = 10.6$ ), the maximum extension length of each linear arm is approximately 3.8 nm ( $0.36 \times 10.6 = 3.8$  nm), provided that all-trans conformation is adopted.

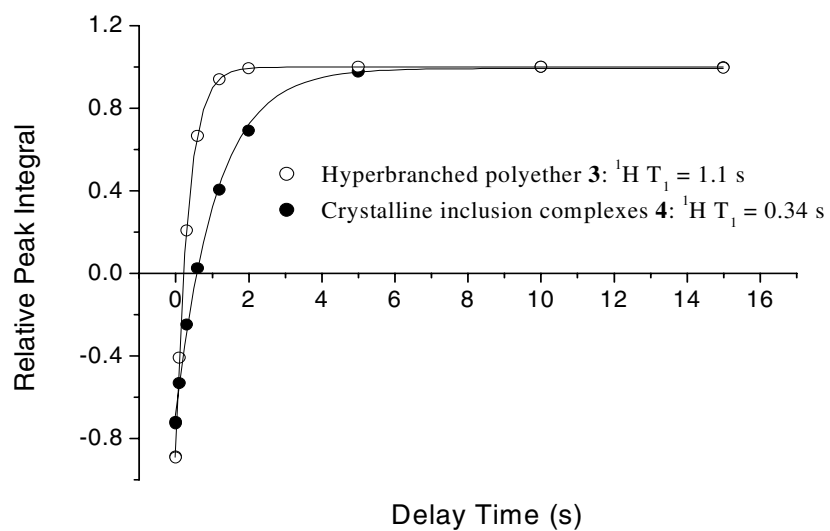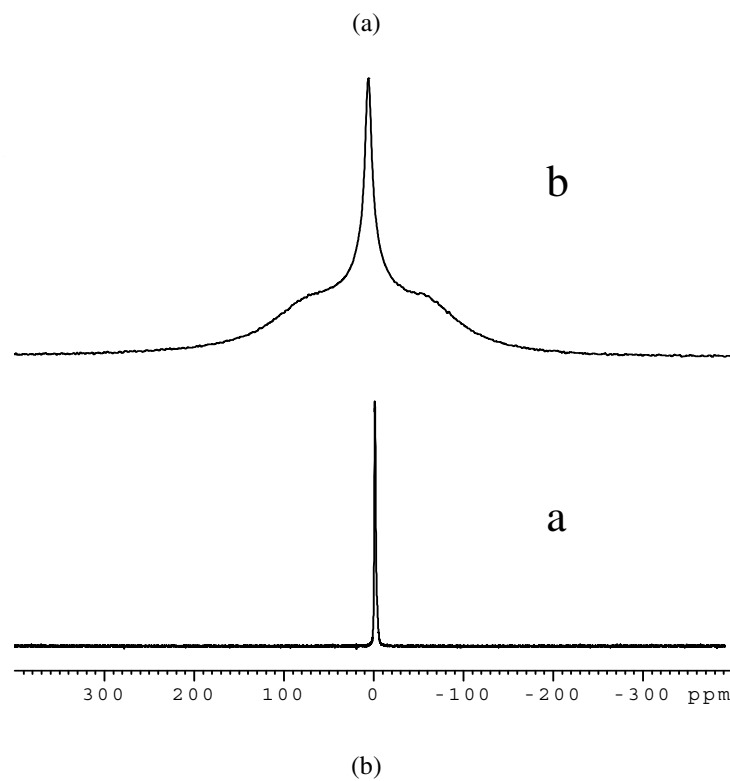

**Figure s2.**  $^1\text{H}$ -NMR spin lattice ( $T_1$ ) relaxation measurements for multi-arm hyperbranched polyether **3** and its correspondent crystalline inclusion complexes **4**: (a) the relationship of relative peak integral with delay time; (b) wide-line  $^1\text{H}$ -NMR spectra, **a**: multi-arm hyperbranched polyether **3**, **b**: crystalline inclusion complexes **4**.

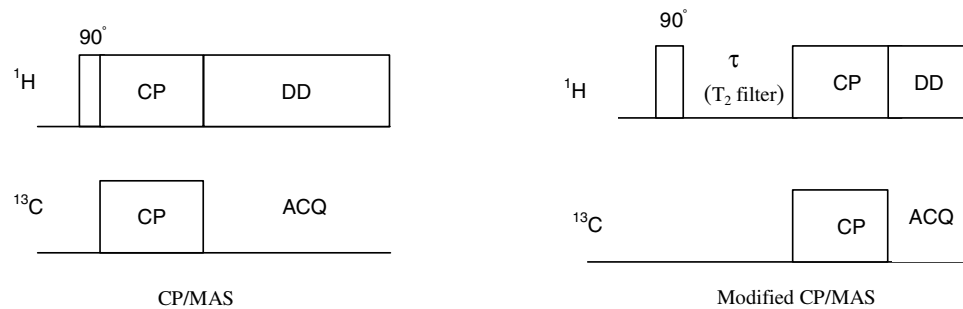

**Figure s3.** The schematic pulse sequences for the routine CP/MAS and the modified CP/MAS with a T<sub>2</sub> filter.

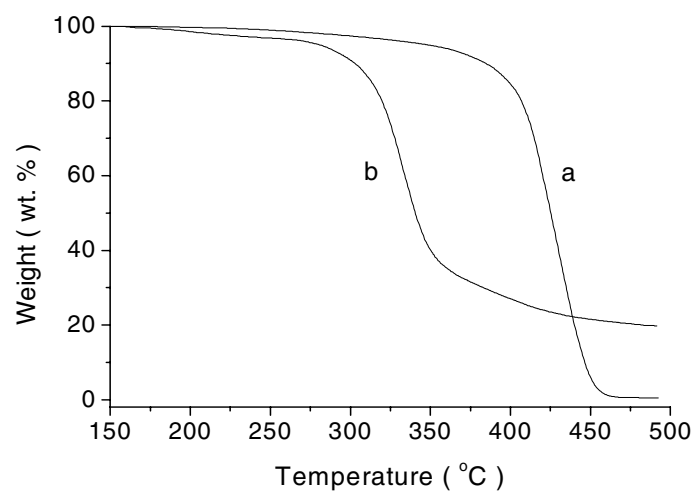

**Figure s4.** TGA thermograms of (a) multi-arm hyperbranched polyether **3** and (b) crystalline inclusion complexes **4**.

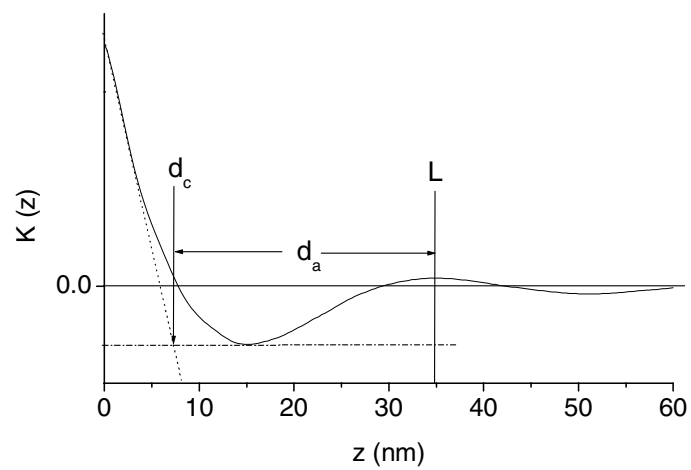

**Figure s5.** Curve of one-dimensional electron-density correlation function for the crystalline inclusion complexes **4**. **L**, **d<sub>c</sub>**, and **d<sub>a</sub>** are the length of long period, crystalline region and amorphous region of lamellar crystals, respectively.
